# Supplementary material for: The Effectiveness of the Incredible Years Program for Children with ADHD: A Meta-Analysis
Source: Research Square preprint supplement (doi:10.21203/rs.3.rs-8427975/v1), 2026-01-27

# Identification of new studies via databases and registers

# Identification of new studies via other methods

Identification

Screening

Screening

Included

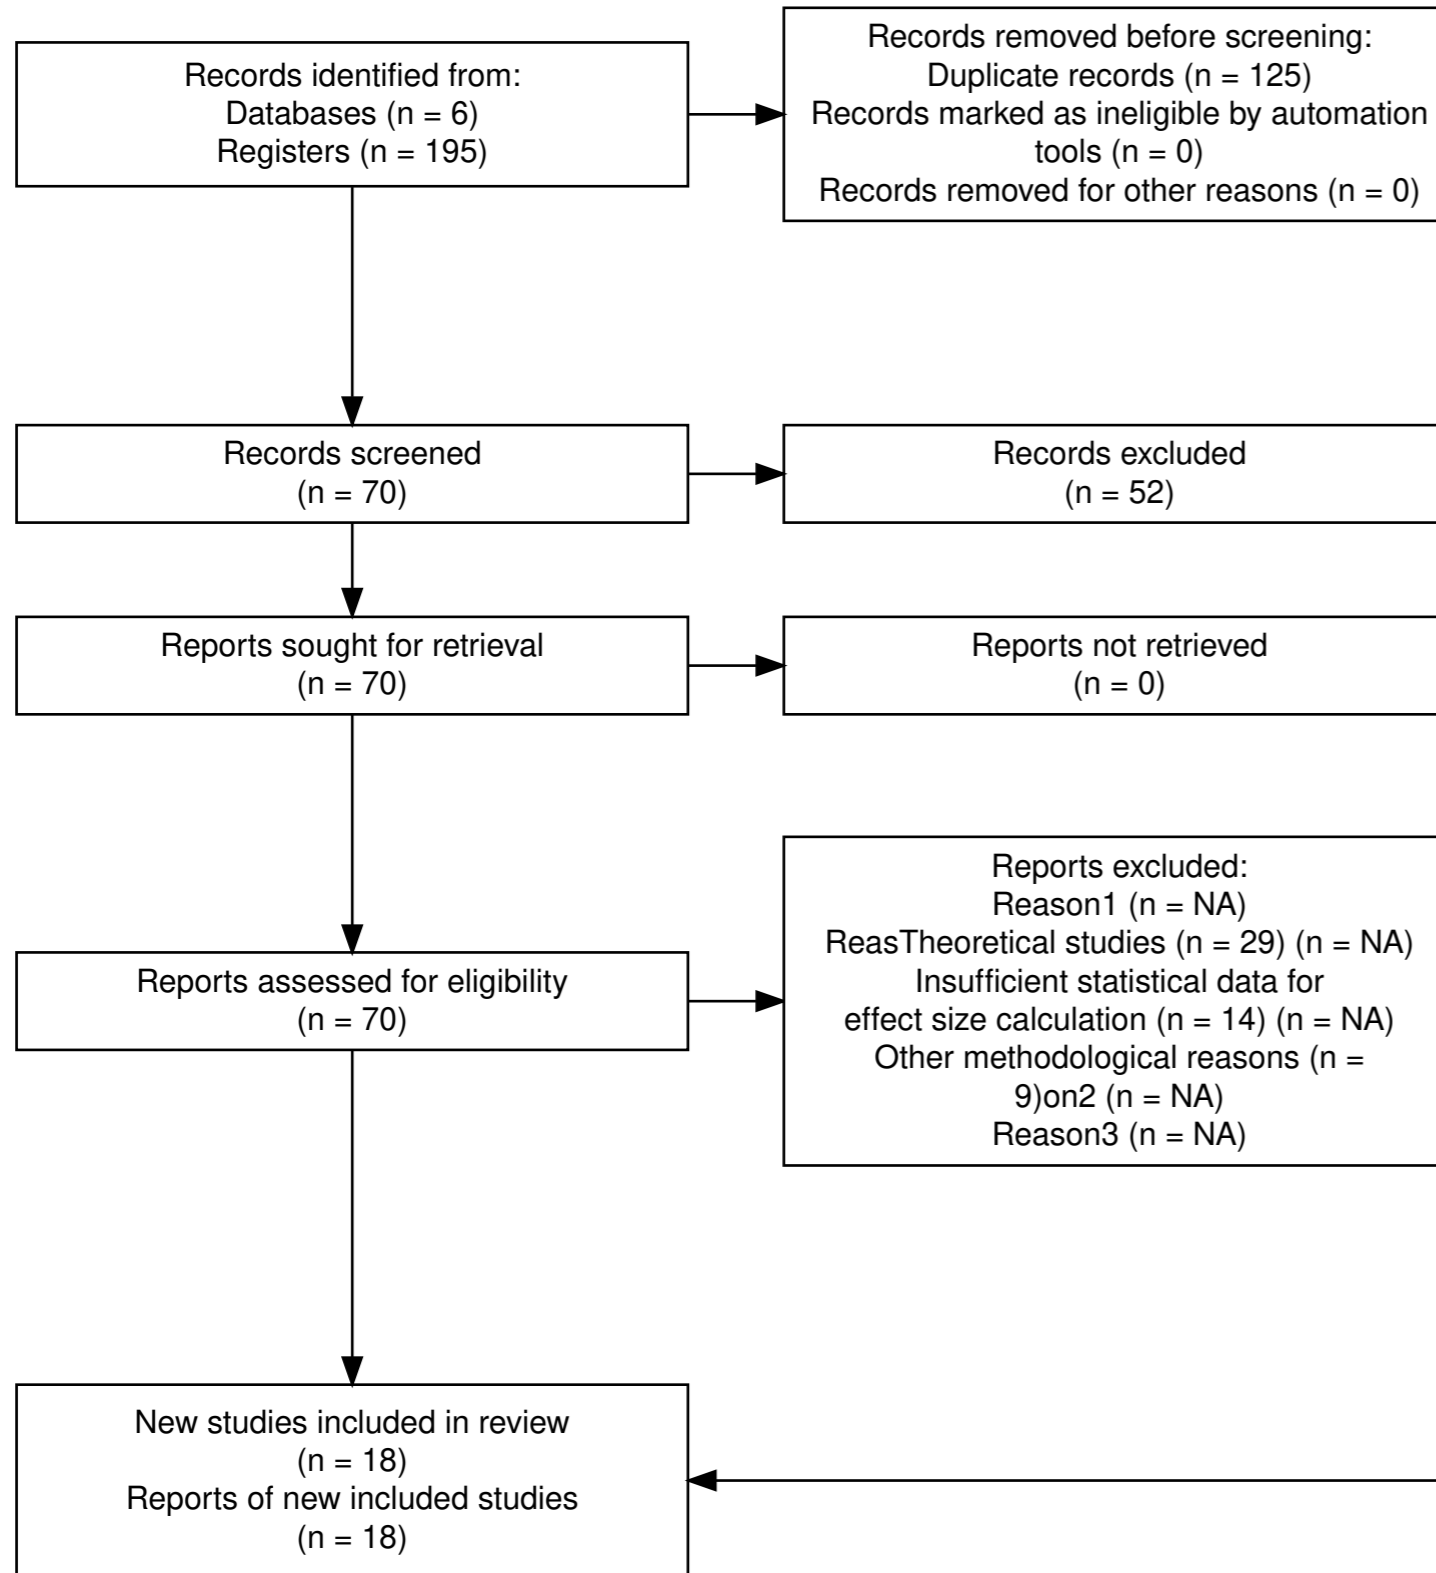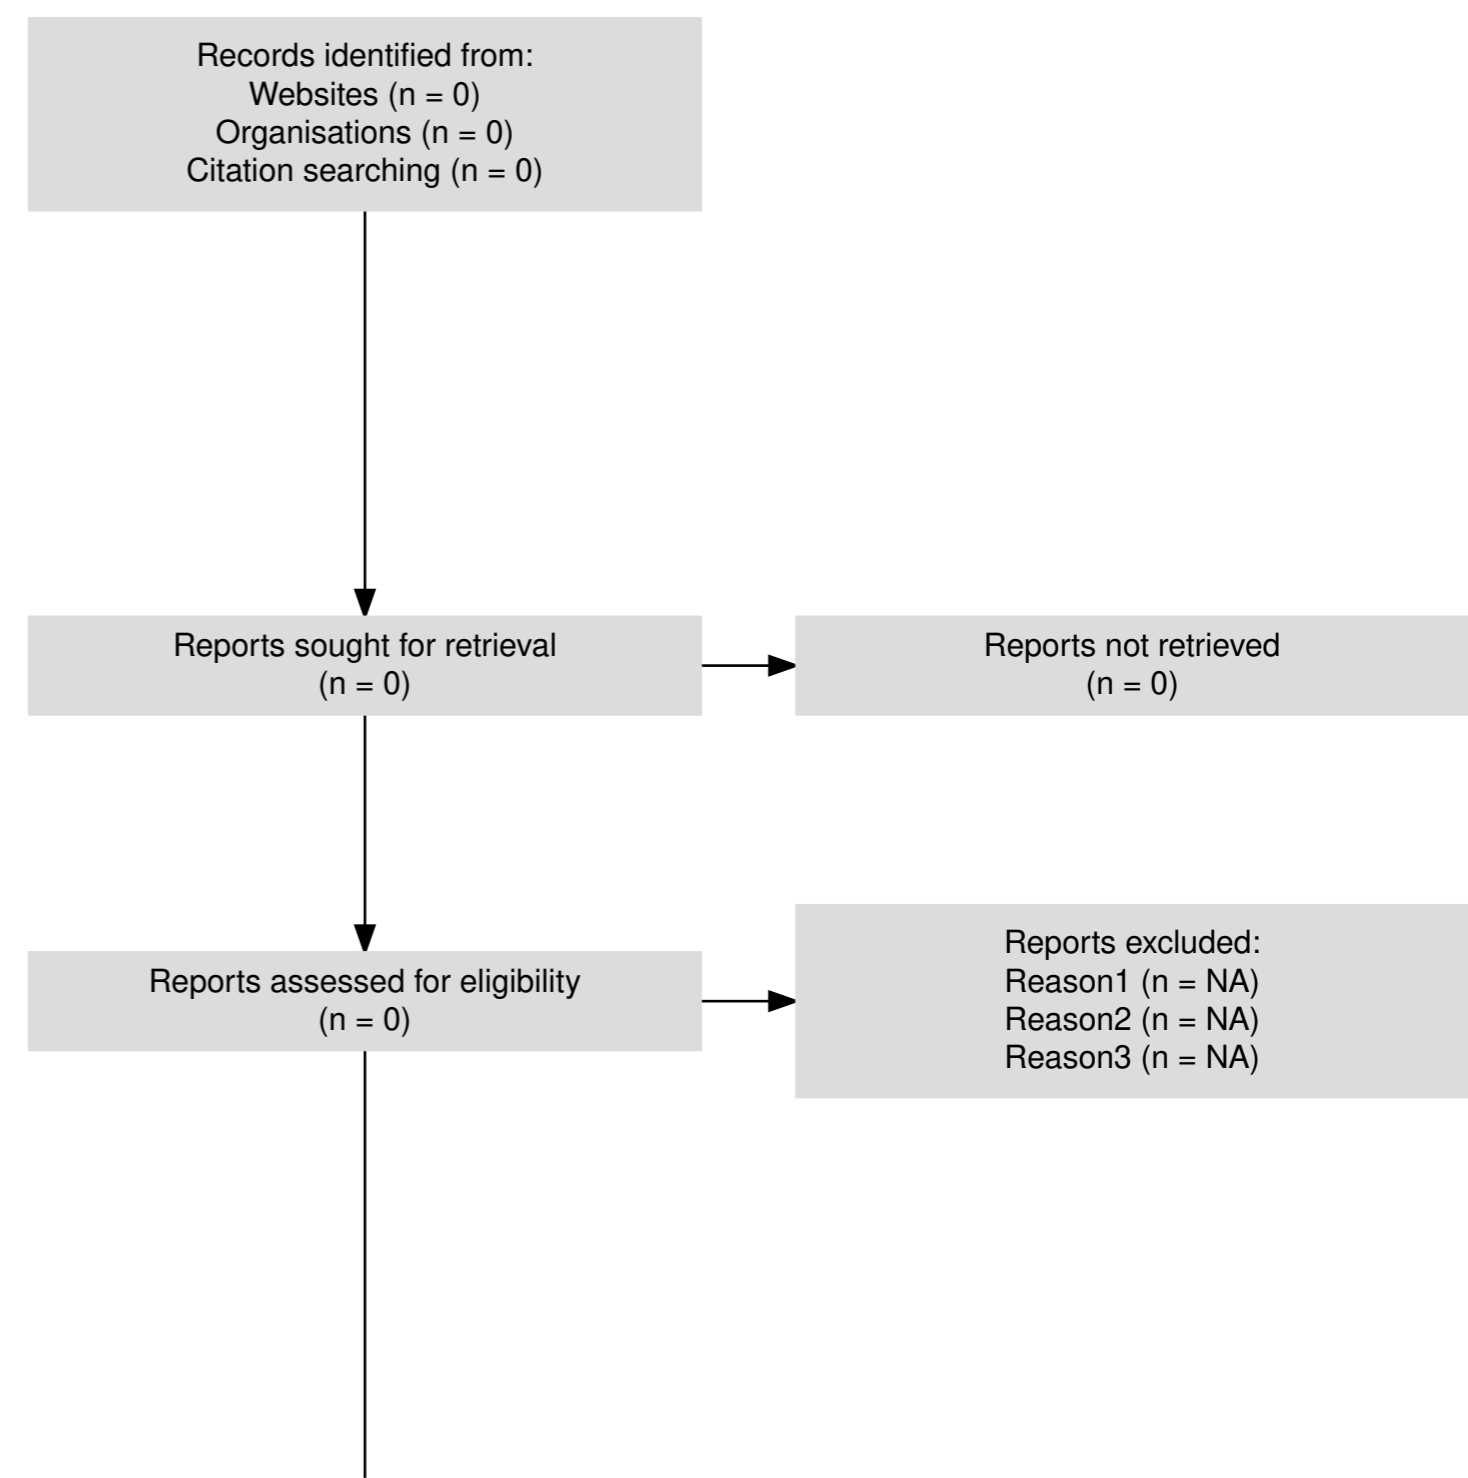

Supplement: Supplementary file 1 [file 73da9898249f8cbd07c4bd0a.pdf]
